# Supplementary material for: Morphological evolution of ZnO nanorod arrays induced by a pH-buffering effect during electrochemical deposition
Source: Royal Society of Chemistry journal article supplement (doi:10.1039/c4ra04342a), 2014-07-03
Supplement: c4ra04342a1.pdf [file c4ra04342a1.pdf]

Electronic Supplementary Information

**Morphological Evolution of ZnO Nanorod Arrays  
Induced by a pH-buffering Effect during Electrochemical Deposition**

Tsutomu Shinagawa<sup>a,\*</sup> and Masanobu Izaki<sup>b</sup>

*<sup>a</sup> Electronic Materials Research Division, Osaka Municipal  
Technical Research Institute, Osaka 536-8553, Japan.*

*\*E-mail: tshina@omtri.or.jp*

*<sup>b</sup> Graduate School of Engineering, Toyohashi University of  
Technology, Toyohashi, Aichi 441-8580, Japan*

## **Experimental**

**Electrodeposition of ZnO.** All aqueous solutions were prepared using reagent-grade chemicals and deionized water purified by a Milli-RX12 Plus system. Prior to the electrodeposition, FTO (Asahi Glass,  $\sim 10 \text{ } \Omega/\text{sq}$ ) substrates were treated with a UV-ozone cleaner, subsequently washed ultrasonically with ethanol and rinsed with deionized water. ZnO was galvanostatically electrodeposited from 0.5 mM  $\text{Zn}(\text{NO}_3)_2 \cdot 6\text{H}_2\text{O}$ –0.1 M  $\text{NaNO}_3$  based aqueous solutions (150 mL) containing various concentrations of  $\text{NH}_4\text{NO}_3$  by applying a cathodic current density of  $0.2 \text{ mA cm}^{-2}$  (total electric charge =  $2.0 \text{ C cm}^{-2}$ ) at  $75 \text{ } ^\circ\text{C}$  with a potentio/galvanostat (Hokuto Denko HABF5001) using the FTO (deposition area =  $1.0 \times 1.5 \text{ cm}^2$ ) substrate as the working electrode and a Zn bar as the counter electrode.

**Characterization of ZnO.** Structural and morphological characterization of electrodeposited ZnO was performed with a field-emission scanning electron microscope (FESEM, JEOL JSM6700F) and an X-ray diffractometer using  $\text{Cu K}\alpha$  radiation (XRD, Rigaku RINT2500).

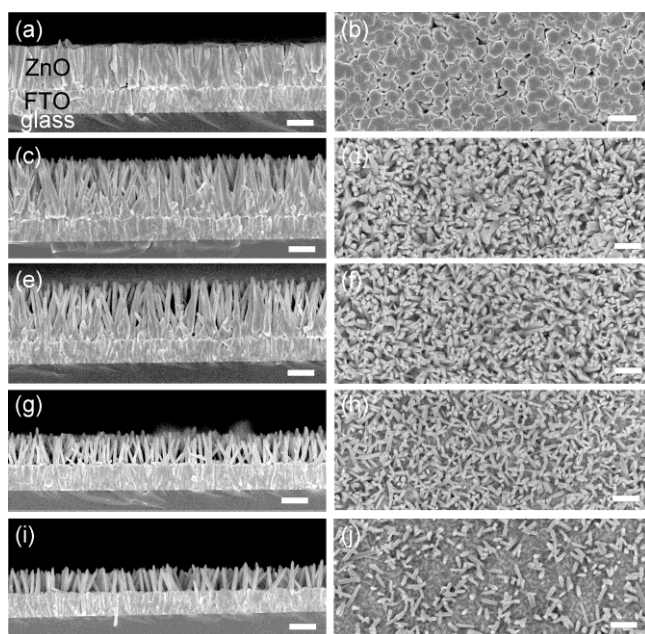

**Figure S1.** Cross-sectional (left) and top-view (right) FESEM images of ZnO electrodeposited on FTO substrates at a current density of  $0.2 \text{ mA cm}^{-2}$  with a total electric charge of  $2.0 \text{ C cm}^{-2}$  from  $\text{Zn}(\text{NO}_3)_2$ - $0.1 \text{ M NaNO}_3$  aqueous solutions at  $75 \text{ }^\circ\text{C}$  with various  $\text{Zn}(\text{NO}_3)_2$  concentrations: (a, b) 50, (c, d) 5.0, (e, f) 1.0, (g, h) 0.5 and (i, j) 0.2 mM. All scale bars are  $1 \text{ }\mu\text{m}$ . The shape of the electrodeposited ZnO changed from (a, b) a form of film to (c–f) nanorod arrays with coalescence, (g, h) separated nanorod arrays and (i, h) sparse nanorod arrays. The diameters of ZnO nanorods obtained from 0.5 and 0.2 mM  $\text{Zn}(\text{NO}_3)_2$  solutions were approximately the same ( $\sim 0.14 \text{ }\mu\text{m}$ ). Furthermore, the amounts of ZnO deposited from these dilute solutions were much smaller than those deposited from solutions with higher  $[\text{Zn}^{2+}]$ ; the volume of ZnO deposited per unit substrate area was estimated from the FESEM images to be  $1.3$  ( $50 \text{ mM Zn}^{2+}$ ),  $0.25$  ( $0.5 \text{ mM Zn}^{2+}$ ) and  $0.03$  ( $0.2 \text{ mM Zn}^{2+}$ )  $\mu\text{m}^3/\mu\text{m}^2 \text{ sub}$ . These results indicate a poor controllability of nanorod diameter and a poor deposition efficiency (i.e. current efficiency) in the case of the electrodeposition from the dilute  $\text{Zn}^{2+}$  solutions.

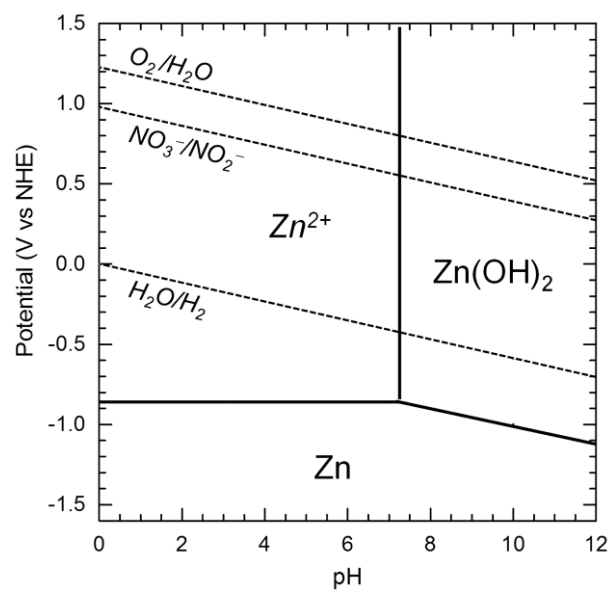

**Figure S2.** Potential-pH diagram of the Zn-H<sub>2</sub>O system (solid line) at 25 °C:  $a(\text{Zn}^{2+}) = 5 \times 10^{-4}$ ,  $a(\text{NO}_3^-) = 0.1$ ,  $a(\text{NO}_2^-) = 10^{-6}$ ,  $p(\text{O}_2) = 1$  and  $p(\text{H}_2) = 1 \text{ atm.}$ <sup>1</sup>

1. M. Pourbaix, *Atlas of electrochemical equilibria in aqueous solutions*, NACE, Houston, TX, 1974.

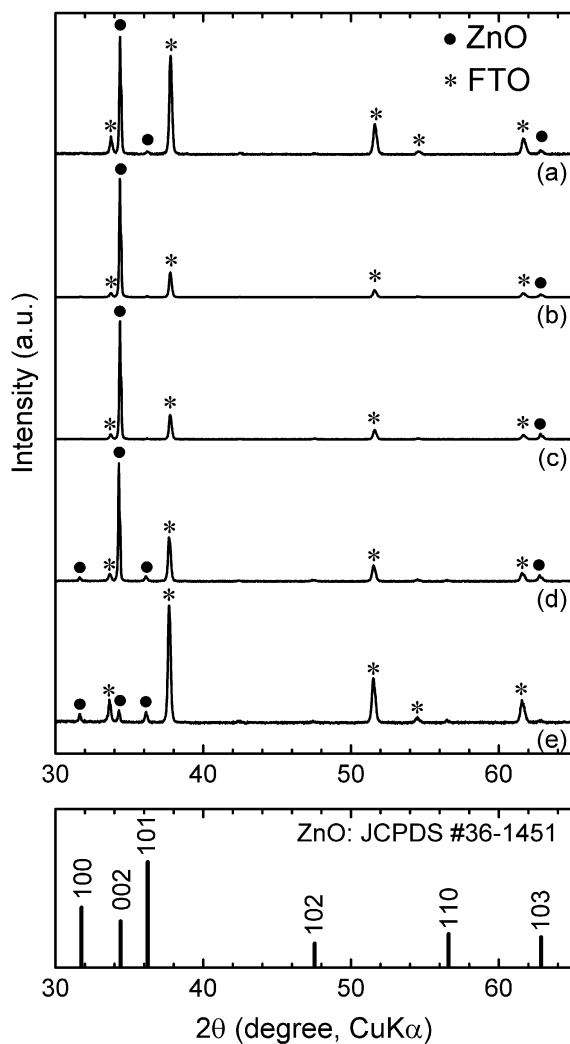

**Figure S3.** XRD patterns of ZnO electrodeposited on FTO substrates at a current density of  $0.2 \text{ mA cm}^{-2}$  with a total electric charge of  $2.0 \text{ C cm}^{-2}$  from  $0.5 \text{ mM Zn(NO}_3)_2$ – $0.1 \text{ M NaNO}_3$  aqueous solutions at  $75 \text{ }^\circ\text{C}$  with various  $\text{NH}_4\text{NO}_3$  concentrations: (a) 0, (b) 1.0, (c) 5.0, (d) 10 and (e) 20 mM. JCPDS-ICDD data for ZnO are also shown for comparison.

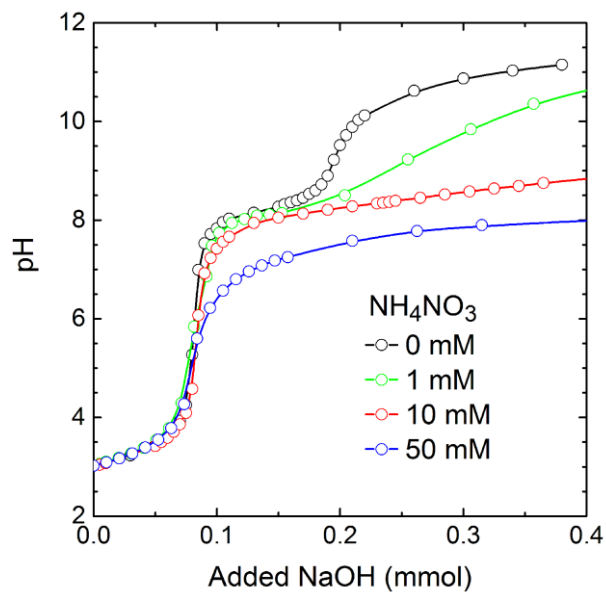

**Figure S4.** pH titration curves of 0.5 mM  $\text{Zn}(\text{NO}_3)_2$ -0.1 M  $\text{NaNO}_3$  aqueous solutions with different  $\text{NH}_4\text{NO}_3$  concentrations of 0, 1.0, 10 and 50 mM. All solutions were initially adjusted to pH = 3.0 with  $\text{HNO}_3$  and subsequently titrated with 10 mM NaOH at room temperature.
